# Supplementary material
Source: HighWire-hosted journal article supplement (http://www.cmaj.ca/highwire/filestream/75762/field_highwire_adjunct_files/3/190883-res-4-at.pdf)
Supplement: 190883-res-4-at.pdf [file 190883-res-4-at.pdf]

**Appendix 4 (as supplied by the authors):** Description of the sensitivity analyses

1. Used a stricter identification algorithm requiring one hospitalization, two physician claims within three years or two or more prescriptions for ADHD drugs in a year plus one physician claim within three years.
2. Required a minimum age of 6 years to identify ADHD diagnosis.
3. Included in-hospital antibiotic dispensation in exposure definition which was not included in the main analysis due to the limited data years and geographic coverage of the in-hospital dispensation dataset.
4. Included prenatal smoking, alcohol and drug use in the model in a subset of the cohort who had data available on these variables.
5. Restricted the cohort to firstborn children.
6. Censored the children at the ages of 6 and 12 years instead of 18 years.
